# Supplementary material
Source: PubMed Central journal article supplement (PMC1820807)
Supplement: bj4010485add.pdf [file bj4010485add.pdf]

## SUPPLEMENTARY MATERIALS

### Supplementary text

#### *Alternative modeling equations*

Most biological processes are inherently non-linear. The Michaelis-Menten rate representation (3, 4) is one of several ways to describe such nonlinearities. We considered the following other representations:

First, reactions  $V2$  and  $V3$  can be rewritten in the form including the basal, receptor- and GAP-independent rates of trimeric complex dissociation and GTP hydrolysis, respectively:

$$\begin{aligned} V2 &= k_2^0 n_1 + k_2 \frac{n_1}{K_2 + n_1} \\ V3 &= k_3^0 n_3 + k_3 \frac{n_3}{K_3 + n_3} \end{aligned} \tag{1},$$

where  $k_2^0$  and  $k_3^0$  are the basal dissociation and hydrolysis rate constants, respectively. As these constants are very low (ca.  $0.005 \text{ sec}^{-1}$  and  $0.05 \text{ sec}^{-1}$ , respectively [1], 100-1000 fold lower than  $k_2$  and  $k_3$ ), exclusion of the basal components of  $V2$  and  $V3$  does not affect modeling presented in the Results.

Second, the Michaelis-Menten rate equation has been developed for situations where the substrate concentration strongly exceeds the enzyme concentration. When this condition is not maintained, the generalized rate equation can be used [2], and  $V2$  and  $V3$  will adopt the following form:

$$\begin{aligned}
V2 &= \frac{k_{diss}}{2} \left( (K_2 + [Rc^*] + n_1) - \sqrt{(K_2 + [Rc^*] + n_1)^2 - 4[Rc^*]n_1} \right) \\
V3 &= \frac{k_{hydr}}{2} \left( (K_3 + [GAP] + n_3) - \sqrt{(K_3 + [GAP] + n_3)^2 - 4[GAP]n_3} \right)
\end{aligned} \tag{2}$$

Third, the three reactions (2-4) of the trimeric G protein cycle can also be expressed in terms of the power-law representation:

$$\begin{cases}
V1 = \alpha1 \cdot n_4^{g1} \cdot n_2^{g2}; \\
V2 = \beta2 \cdot n_1^{h1} \cdot [Rc^*]^{h2}; \\
V3 = \beta3 \cdot n_3^{h3} \cdot [GAP]^{h4}
\end{cases} \tag{3},$$

where  $\alpha1$ ,  $\beta2$ , and  $\beta3$  are rate constants, and  $g1$ ,  $g2$ ,  $h1$ ,  $h2$ ,  $h3$ , and  $h4$  are kinetic orders [3]. Mass conservation (5a-5b) has to be applied to obtain the system of two independent differential equations:

$$\begin{cases}
\frac{d[\beta\gamma]}{dt} = \frac{dn_2}{dt} = \beta2 \cdot (M - n_2)^{h1} \cdot [Rc^*]^{h2} - \alpha1 \cdot (n_2 - n_3)^{g1} \cdot n_2^{g2}; \\
\frac{d[G\alpha^{GTP}]}{dt} = \frac{dn_3}{dt} = \beta2 \cdot (M - n_2)^{h1} \cdot [Rc^*]^{h2} - \beta3 \cdot n_3^{h3} \cdot [GAP]^{h4}
\end{cases} \tag{4}.$$

The feedback loops (15-16) in the trimeric G protein cycle can also be successfully modeled using the power-law representation, such as

$$\begin{cases}
V2 = \beta2 \cdot n_1^{h1} \cdot [Rc^*]^{h2} \cdot n_3^{h6}; \\
\frac{d[Rc^*]}{dt} = V_{del} - \beta4 \cdot [Rc^*]^{h5} \cdot n_3^{h7}
\end{cases} \tag{5}.$$

Such power-law representations have been widely used in metabolic modeling, and can be useful for non-ideal kinetics [4], as well as to incorporate additional regulations, as the Michaelis-Menten representation becomes cumbersome for complicated pathways [3].

It is important to note that all above-mentioned forms of modeling the trimeric G protein cycle have reproduced the diversity in behavior of the system reported in this work.

**Supplementary Table 1: Cell volumes**

| <b>Cell/organism</b>           | <b>volume</b> | <b>reference</b>                                                                                                                                                      |
|--------------------------------|---------------|-----------------------------------------------------------------------------------------------------------------------------------------------------------------------|
| human platelet                 | 10 fl         | <a href="http://www.fpnotebook.com/HEM109.htm">http://www.fpnotebook.com/HEM109.htm</a>                                                                               |
| <i>S. cerevisiae</i> (haploid) | 30 fl         | [5]                                                                                                                                                                   |
| human erythrocyte              | 100 fl        | <a href="http://web2.iadfw.net/uthman/blood_cells.html">http://web2.iadfw.net/uthman/blood_cells.html</a>                                                             |
| human neutrophil               | 300 fl        | [6]                                                                                                                                                                   |
| human lymphocyte               | 400 fl        |                                                                                                                                                                       |
| <i>Dictyostelium</i> amoeba    | 500 fl        | [7]                                                                                                                                                                   |
| S49 lymphoma cell line/mouse   | 800 fl        | [8]                                                                                                                                                                   |
| human peritoneal fibroblast    | 2200 fl       | <a href="http://www.pdiconnect.com/archive.php?op=read&amp;mode=full&amp;entryid=645">http://www.pdiconnect.com/archive.php?op=read&amp;mode=full&amp;entryid=645</a> |
| human ventricular myocyte      | 25 pl         | [9]                                                                                                                                                                   |

**Supplementary Table2. Amounts of GPCR/trimeric G protein/RGS molecules per cell**

| molecule                                        | cell type                           | organism               | molecules/cell               | ref      | cellular concentration   |
|-------------------------------------------------|-------------------------------------|------------------------|------------------------------|----------|--------------------------|
| <b>1. GPCR receptors</b>                        |                                     |                        |                              |          |                          |
| prostaglandin E2 receptor<br>-after stimulation | T cells                             | human                  | 435±322<br>1035±357          | [10]     | 2 nM<br>5 nM             |
| β-adrenergic receptor                           | S49 lymphoma                        | mouse                  | 1220±67                      | [11]     | 3 nM                     |
| bradykinin receptor                             | Rat-1 fibroblasts, ras-1 ransformed | rat                    | 8350±160                     | [12]     | 6 nM                     |
| β-adrenergic receptor                           | myocyte                             | rat                    | 2.1 x 10 <sup>5</sup>        | [13]     | 13 nM                    |
| PAF receptor                                    | platelets                           | human<br>pig<br>rabbit | 281±63<br>281±158<br>689±229 | [14, 15] | 50 nM<br>50 nM<br>115 nM |
| cAMP receptor                                   | amoeba                              | <i>D.discoideum</i>    | 40,000                       | [7]      | 130 nM                   |
| fMLP receptor                                   | HL60 cells                          | human                  | 50,000                       | [16]     | 250 nM                   |
| Ste2 (pheromone receptor)                       | yeast                               | <i>S.cerevisiae</i>    | 8000                         | [17]     | 460 nM                   |
| Rhodopsin                                       | rod outer segments                  | human                  |                              | [18]     | 3 mM                     |
| <b>2. G proteins</b>                            |                                     |                        |                              |          |                          |
| Gpa1<br>-after stimulation                      | yeast                               | <i>S.cerevisiae</i>    | 8000<br>12000                | [19]     | 460 nM<br>690 nM         |
| pertussis toxin-sensitive Gα                    | HL60 cells                          | human                  | 130000                       | [16]     | 650 nM                   |
| Gs                                              | S49 lymphoma                        | mouse                  | 130000                       | [20]     | 270 nM                   |
| Gs                                              | myocyte                             | rat                    | 4.7 x 10 <sup>7</sup>        | [13]     | 3 μM                     |
| transducin                                      | rod outer segments                  | human                  |                              | [18]     | 300 μM                   |
| <b>3. RGS</b>                                   |                                     |                        |                              |          |                          |
| RGS2L                                           | NG108-15 neuroblastoma              | rat                    |                              | [21]     | 10-100 nM                |
| Sst2<br>-after stimulation                      | yeast                               | <i>S.cerevisiae</i>    | 2000<br>5000                 | [19]     | 115 nM<br>290 nM         |

**Supplementary Table 3. Data for  $G\alpha^{GDP} + \beta\gamma$  association.**

| <b>molecules</b>                                           | <b>organism/source</b>                                      | <b><math>k_{ass}</math></b>                  | <b>ref</b> | <b>method</b>                          |
|------------------------------------------------------------|-------------------------------------------------------------|----------------------------------------------|------------|----------------------------------------|
| $\alpha_i^{myr} + \text{bovine brain } \beta\gamma$        | rat (bacterial production), bovine                          | $0.7 * 10^6 \text{ M}^{-1} \text{ sec}^{-1}$ | [22]       | flow cytometry                         |
| $\alpha_i + \text{bovine brain } \beta\gamma$              | bovine brain                                                | $4 * 10^4 \text{ M}^{-1} \text{ sec}^{-1}$   | [23]       | surface plasmon resonance spectroscopy |
| $\alpha_{i2} + \beta_1\gamma_1$                            | human (baculovirus production)                              | $4.4 * 10^4 \text{ M}^{-1} \text{ sec}^{-1}$ | [24]       | optical biosensor                      |
| $\alpha_{i2} + \beta_1\gamma_2$                            | human (baculovirus production)                              | $3.4 * 10^4 \text{ M}^{-1} \text{ sec}^{-1}$ | [24]       | optical biosensor                      |
|                                                            |                                                             |                                              |            |                                        |
|                                                            |                                                             | <b><math>K_d</math></b>                      |            |                                        |
| $\alpha_i^{myr} + \text{bovine brain } \beta\gamma$        | rat (bacterial production), bovine                          | 3 nM                                         | [22]       |                                        |
| $\alpha_{i1}^{myr}, \text{ bovine brain } \beta\gamma$     | rat (bacterial production), bovine                          | 0.2 nM                                       | [25]       |                                        |
| $\alpha_o^{myr} + \text{bovine brain } \beta\gamma$        | rat (bacterial production), bovine                          | 17 nM                                        | [25]       |                                        |
| $\alpha_s + \text{bovine brain } \beta\gamma$              | rat (bacterial production), bovine                          | 27 nM                                        | [25]       |                                        |
| $\alpha_{41} / \alpha_{39} + \text{biotinyl } \beta\gamma$ | bovine brain                                                | 20 nM / 350 nM                               | [26]       |                                        |
| FITC- $\alpha_o + \text{rhodamine-}\beta\gamma$            | bovine brain                                                | 10 nM                                        | [27]       | steady-state FRET                      |
| $\alpha_{39}$                                              | bovine brain                                                | 100 nM                                       | [28]       | pertussis toxin assay                  |
| $\alpha_s / \alpha_o + \beta_1\gamma_1$                    | rabbit liver, bovine brain, bovine (baculovirus production) | 2 nM                                         | [29]       |                                        |
| $\alpha_s / \alpha_o + \text{other } \beta\gamma$          | rabbit liver, bovine brain, bovine (baculovirus production) | 0.2 - 0.5 nM                                 | [29]       |                                        |
| $\alpha_{i2}^{myr} + \text{any } \beta\gamma$              | bovine (bacterial and baculovirus production)               | 0.4 nM                                       | [29]       |                                        |
| $\alpha_{i2}^{myr} + \beta_1\gamma_1$                      | bovine (bacterial and baculovirus production)               | 85 nM                                        | [24]       |                                        |
| $\alpha_{i2}^{myr} + \beta_1\gamma_2$                      | bovine (bacterial and baculovirus production)               | 134 nM                                       | [24]       |                                        |

**Supplementary Table 4. Data for GPCR-driven dissociation of the trimeric G proteins.**

| <b>molecules</b>                              | <b>organism, source</b>                 | <b><math>k_{\text{diss}}</math></b> | <b>ref</b> |
|-----------------------------------------------|-----------------------------------------|-------------------------------------|------------|
| Gs + $\beta$ -adrenergic receptor             | rabbit hepatocytes/ turkey erythrocytes | 1-5 sec <sup>-1</sup>               | [1, 30]    |
| Gq + muscarinic cholinergic (m1AChR) receptor | mouse/human (baculovirus production)    | 1.8 sec <sup>-1</sup>               | [31]       |
| Gi + $\alpha_{2a}$ AR adrenoreceptor          | hamster/porcine                         | 5 sec <sup>-1</sup>                 | [32]       |
| Gi + muscarinic receptor (M2 mAChR)           | baculovirus production                  | 0.34 sec <sup>-1</sup>              | [33]       |
| Gt + rhodopsin                                | bovine                                  | 286 sec <sup>-1</sup>               | [34]       |
| Gt + rhodopsin                                | frog                                    | 120 sec <sup>-1</sup>               | [35, 36]   |
| Golf + olfaction receptor                     | rat, olfactory cilia                    | at least 20 sec <sup>-1</sup>       | [35, 36]   |
| Gq + rhodopsin                                | drosophila                              | at least 20 sec <sup>-1</sup>       | [36, 37]   |

**Supplementary Table 5. Data for GAP-driven GTPase.**

| <b>molecules</b>    | <b><math>K_M</math></b>             | <b>reference</b> | <b>notes</b> |
|---------------------|-------------------------------------|------------------|--------------|
| Gz + RGSZ1          | 2 nM                                | [38]             |              |
| Gz + RGSZ1          | 15 nM                               | [39]             | 5°C          |
|                     |                                     |                  |              |
|                     | <b><math>k_{\text{hydr}}</math></b> |                  |              |
| Gq + PLC- $\beta$ 1 | 9-12 sec <sup>-1</sup>              | [31]             |              |
| Gq + RGS4           | 22-27 sec <sup>-1</sup>             | [31]             |              |
| Gz + RGSZ1/GAIP     | 40 min <sup>-1</sup>                | [38]             |              |
| Gt-RGS4             | 2.8 sec <sup>-1</sup>               | [40]             |              |
| Go-RGS4             | 2 sec <sup>-1</sup>                 | [41]             | 8°C          |

## SUPPLEMENTARY MATERIALS REFERENCES

- 1 Gilman, A. G. (1987) G proteins: transducers of receptor-generated signals. *Annu. Rev. Biochem.* **56**, 615-649
- 2 Segel, I. H. (1975) *Enzyme Kinetics. Behavior and Analysis of Rapid Equilibrium and Steady-State Enzyme Systems*. John Wiley & Sons, Inc., New York
- 3 Voit, E. O. (2000) *Computational Analysis of Biochemical Systems. A Practical Guide for Biochemists and Molecular Biologists*. Cambridge University Press, Cambridge
- 4 Savageau, M. A. (1976) *Biochemical Systems Analysis: A Study of Function and Design in Molecular Biology*. Addison-Wesley, Reading, MA
- 5 (1997) *Yeast*. In McGraw-Hill Encyclopedia of Science and Technology, McGraw-Hill Professional, Pennsylvania
- 6 Worthen, G. S., Schwab, B., 3rd, Elson, E. L. and Downey, G. P. (1989) Mechanics of stimulated neutrophils: cell stiffening induces retention in capillaries. *Science* **245**, 183-186
- 7 Mato, J. M., Losada, A., Nanjundiah, V. and Konijn, T. M. (1975) Signal input for a chemotactic response in the cellular slime mold *Dictyostelium discoideum*. *Proc. Natl. Acad. Sci. U. S. A.* **72**, 4991-4993
- 8 Watson, P. A. (1989) Accumulation of cAMP and calcium in S49 mouse lymphoma cells following hyposmotic swelling. *J. Biol. Chem.* **264**, 14735-14740
- 9 Jafri, M. S., Rice, J. J. and Winslow, R. L. (1998) Cardiac Ca<sup>2+</sup> dynamics: the roles of ryanodine receptor adaptation and sarcoplasmic reticulum load. *Biophys. J.* **74**, 1149-1168
- 10 Holter, W., Spiegel, A. M., Howard, B. H., Weber, S. and Brann, M. R. (1991) Expression of GTP-binding proteins and prostaglandin E2 receptors during human T cell activation. *Cell. Immunol.* **134**, 287-295
- 11 Insel, P. A., Mahan, L. C., Motulsky, H. J., Stoolman, L. M. and Koachman, A. M. (1983) Time-dependent decreases in binding affinity of agonists for beta-adrenergic receptors of intact S49 lymphoma cells. A mechanism of desensitization. *J. Biol. Chem.* **258**, 13597-13605
- 12 Downward, J., de Gunzburg, J., Riehl, R. and Weinberg, R. A. (1988) p21ras-induced responsiveness of phosphatidylinositol turnover to bradykinin is a receptor number effect. *Proc. Natl. Acad. Sci. U. S. A.* **85**, 5774-5778
- 13 Post, S. R., Hilal-Dandan, R., Urasawa, K., Brunton, L. L. and Insel, P. A. (1995) Quantification of signalling components and amplification in the beta-adrenergic-receptor-adenylate cyclase pathway in isolated adult rat ventricular myocytes. *Biochem. J.* **311 ( Pt 1)**, 75-80
- 14 Lopez Diez, F., Nieto, M. L., Fernandez-Gallardo, S., Gijon, M. A. and Sanchez Crespo, M. (1989) Occupancy of platelet receptors for platelet-activating factor in patients with septicemia. *J. Clin. Invest.* **83**, 1733-1740
- 15 Duronio, V., Reany, A., Wong, S., Bigras, C. and Salari, H. (1990) Characterization of platelet-activating factor receptors in porcine platelets. *Can. J. Physiol. Pharmacol.* **68**, 1514-1519

- 16 Wieland, T., Liedel, K., Kaldenberg-Stasch, S., Meyer zu Heringdorf, D., Schmidt, M. and Jakobs, K. H. (1995) Analysis of receptor-G protein interactions in permeabilized cells. *Naunyn Schmiedebergs Arch. Pharmacol.* **351**, 329-336
- 17 Jenness, D. D., Burkholder, A. C. and Hartwell, L. H. (1986) Binding of alpha-factor pheromone to *Saccharomyces cerevisiae* a cells: dissociation constant and number of binding sites. *Mol. Cell. Biol.* **6**, 318-320
- 18 Stryer, L. and Bourne, H. R. (1986) G proteins: a family of signal transducers. *Annu. Rev. Cell. Biol.* **2**, 391-419
- 19 Hao, N., Yildirim, N., Wang, Y., Elston, T. C. and Dohlman, H. G. (2003) Regulators of G protein signaling and transient activation of signaling: experimental and computational analysis reveals negative and positive feedback controls on G protein activity. *J. Biol. Chem.* **278**, 46506-46515
- 20 Ransnas, L. A. and Insel, P. A. (1988) Quantitation of the guanine nucleotide binding regulatory protein Gs in S49 cell membranes using anti-peptide antibodies to alpha s. *J. Biol. Chem.* **263**, 9482-9485
- 21 Tosetti, P., Parente, V., Taglietti, V., Dunlap, K. and Toselli, M. (2003) Chick RGS2L demonstrates concentration-dependent selectivity for pertussis toxin-sensitive and -insensitive pathways that inhibit L-type Ca<sup>2+</sup> channels. *J. Physiol.* **549**, 157-169
- 22 Sarvazyan, N. A., Remmers, A. E. and Neubig, R. R. (1998) Determinants of gi1alpha and beta gamma binding. Measuring high affinity interactions in a lipid environment using flow cytometry. *J. Biol. Chem.* **273**, 7934-7940
- 23 Rebois, R. V., Schuck, P. and Northup, J. K. (2002) Elucidating kinetic and thermodynamic constants for interaction of G protein subunits and receptors by surface plasmon resonance spectroscopy. *Methods Enzymol.* **344**, 15-42
- 24 Figler, R. A., Lindorfer, M. A., Graber, S. G., Garrison, J. C. and Linden, J. (1997) Reconstitution of bovine A1 adenosine receptors and G proteins in phospholipid vesicles: betagamma-subunit composition influences guanine nucleotide exchange and agonist binding. *Biochemistry* **36**, 16288-16299
- 25 Sarvazyan, N. A., Lim, W. K. and Neubig, R. R. (2002) Fluorescence analysis of receptor-G protein interactions in cell membranes. *Biochemistry* **41**, 12858-12867
- 26 Kohnken, R. E. and Hildebrandt, J. D. (1989) G protein subunit interactions. Studies with biotinylated G protein subunits. *J. Biol. Chem.* **264**, 20688-20696
- 27 Heithier, H., Frohlich, M., Dees, C., Baumann, M., Haring, M., Gierschik, P., Schiltz, E., Vaz, W. L., Hekman, M. and Helmreich, E. J. (1992) Subunit interactions of GTP-binding proteins. *Eur. J. Biochem.* **204**, 1169-1181
- 28 Huff, R. M., Axton, J. M. and Neer, E. J. (1985) Physical and immunological characterization of a guanine nucleotide-binding protein purified from bovine cerebral cortex. *J. Biol. Chem.* **260**, 10864-10871
- 29 Ueda, N., Iniguez-Lluhi, J. A., Lee, E., Smrcka, A. V., Robishaw, J. D. and Gilman, A. G. (1994) G protein beta gamma subunits. Simplified purification and properties of novel isoforms. *J. Biol. Chem.* **269**, 4388-4395
- 30 Pedersen, S. E. and Ross, E. M. (1982) Functional reconstitution of beta-adrenergic receptors and the stimulatory GTP-binding protein of adenylate cyclase. *Proc. Natl. Acad. Sci. U. S. A.* **79**, 7228-7232



- 31 Mukhopadhyay, S. and Ross, E. M. (1999) Rapid GTP binding and hydrolysis by G(q) promoted by receptor and GTPase-activating proteins. *Proc. Natl. Acad. Sci. U. S. A.* **96**, 9539-9544
- 32 Zhong, H., Wade, S. M., Woolf, P. J., Linderman, J. J., Traynor, J. R. and Neubig, R. R. (2003) A spatial focusing model for G protein signals. Regulator of G protein signaling (RGS) protein-mediated kinetic scaffolding. *J. Biol. Chem.* **278**, 7278-7284
- 33 Mosser, V. A., Amana, I. J. and Schimerlik, M. I. (2002) Kinetic analysis of M2 muscarinic receptor activation of Gi in Sf9 insect cell membranes. *J. Biol. Chem.* **277**, 922-931
- 34 Chabre, M. (1993) In *The GTPase Superfamily* (Marsh, J. and Goode, J., eds.), pp. 112-124, Ciba Foundation Symposium S.
- 35 Breer, H., Boekhoff, I. and Tareilus, E. (1990) Rapid kinetics of second messenger formation in olfactory transduction. *Nature* **345**, 65-68
- 36 Leskov, I. B., Klenchin, V. A., Handy, J. W., Whitlock, G. G., Govardovskii, V. I., Bownds, M. D., Lamb, T. D., Pugh, E. N., Jr. and Arshavsky, V. Y. (2000) The gain of rod phototransduction: reconciliation of biochemical and electrophysiological measurements. *Neuron* **27**, 525-537
- 37 Wu, C. F. and Pak, W. L. (1978) Light-induced voltage noise in the photoreceptor of *Drosophila melanogaster*. *J. Gen. Physiol.* **71**, 249-268
- 38 Wang, J., Ducret, A., Tu, Y., Kozasa, T., Aebersold, R. and Ross, E. M. (1998) RGSZ1, a Gz-selective RGS protein in brain. Structure, membrane association, regulation by G $\alpha$  phosphorylation, and relationship to a Gz gtpase-activating protein subfamily. *J. Biol. Chem.* **273**, 26014-26025
- 39 Tang, W., Tu, Y., Nayak, S. K., Woodson, J., Jehl, M. and Ross, E. M. (2006) Gbetagamma inhibits G $\alpha$  GTPase-activating proteins by inhibition of G $\alpha$ -GTP binding during stimulation by receptor. *J. Biol. Chem.* **281**, 4746-4753
- 40 Nekrasova, E. R., Berman, D. M., Rustandi, R. R., Hamm, H. E., Gilman, A. G. and Arshavsky, V. Y. (1997) Activation of transducin guanosine triphosphatase by two proteins of the RGS family. *Biochemistry* **36**, 7638-7643
- 41 Posner, B. A., Mukhopadhyay, S., Tesmer, J. J., Gilman, A. G. and Ross, E. M. (1999) Modulation of the affinity and selectivity of RGS protein interaction with G $\alpha$  subunits by a conserved asparagine/serine residue. *Biochemistry* **38**, 7773-7779
